# Supplementary material for: Emissive triphenylamine functionalised 1,8-naphthalimide and naphthalene diimide fluorophores: aggregation, computation and biological studies
Source: Royal Society of Chemistry journal article supplement (doi:10.1039/d4tb01905a), 2024-11-26
Supplement: d4tb01905a2.pdf [file d4tb01905a2.pdf]

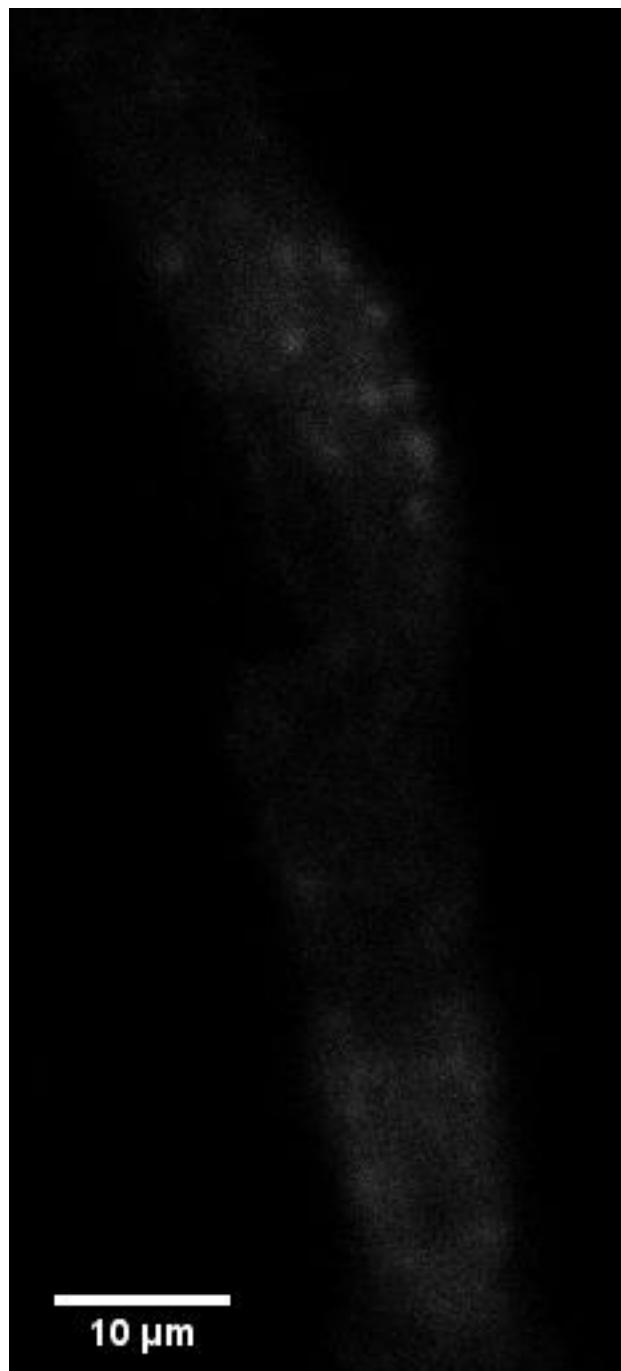

**SI Movies 1.** Z-Stack of a single MDA-MB 231 cell (0.1 micron) showing intracellular staining pattern of **2**.

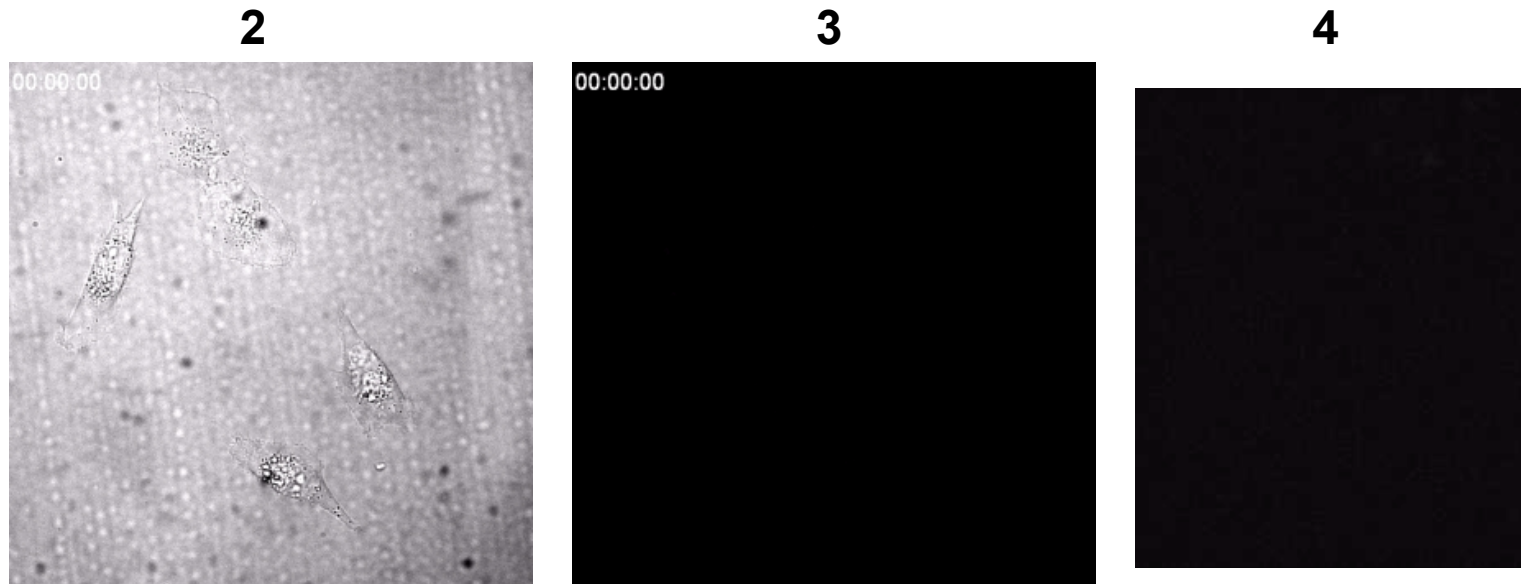

**SI Movies 2 -4.** Widefield microscopy imaging of the uptake of **3** over 2 h in live MDA-MB 231 cells with images acquired every 10 min. (A) Brightfield images; (B) Fluorescence images excit 435 (40) nm; (C) Expansion of single cell from Move B.

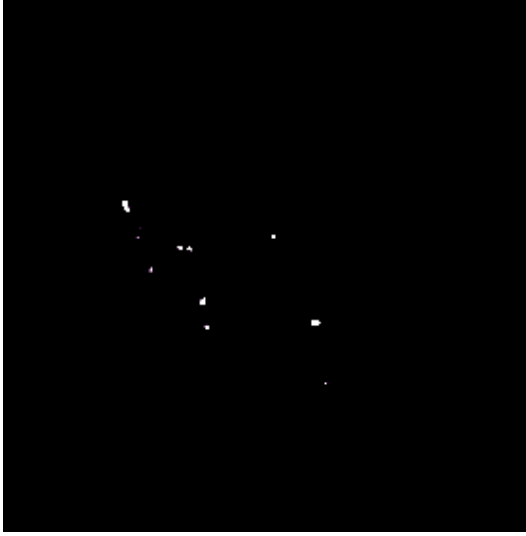

**SI Movie 5.** Z-Stack of a single MDA-MB 231 cell (0.1 micron) showing intracellular staining pattern of **3**.
